1                    **The importance of animal weapons and fighting style in animal contests**

2

3                    Alexandre V. Palaoro<sup>1,2,\*</sup> & Paulo Enrique Cardoso Peixoto<sup>3</sup>

4

5                    <sup>1</sup>LUTA do Departamento de Ecologia e Biologia Evolutiva, Universidade Federal de São Paulo,

6                    Brazil

7                    <sup>2</sup>LAGE do Departamento de Ecologia, Universidade de São Paulo, Brazil

8                    <sup>3</sup>LASEXIA, Departamento de Genética, Ecologia e Evolução, Universidade Federal de Minas

9                    Gerais, Brazil

10

11                    \* Corresponding author: LUTA do Departamento de Ecologia e Biologia Evolutiva,

12                    Universidade Federal de São Paulo, São Paulo, Brazil. Rua Artur Riedel, 275, Eldorado,

13                    Diadema, CEP 09972-270. E-mail: [alexandre.palaoro@gmail.com](mailto:alexandre.palaoro@gmail.com)

14

15                    **Word count.** 11,584

16 **ABSTRACT**

17 In many species that fight over resources, individuals use specialized structures to gain  
18 mechanical advantage over their rivals during contests (i.e., weapons). Although weapons are  
19 widespread across animals, how they affect the probability of winning contests is still debated.  
20 According to theory, understanding the weapons' function in contests depends on identifying  
21 differences in how weapons are measured (e.g., weapon length *versus* shape), and in how  
22 weapons are used during fights. Here, we developed a meta-analysis spanning 1,138 studies,  
23 from which were drawn 52 species and 107 effect sizes to identify: (1) what aspects of animal  
24 weapons are measured in the literature, and how these measures bias our knowledge; (2) how  
25 animals use their weapons during fights - i.e., weapon function; and (3) if weapon function  
26 correlates to the magnitude of how weapons influence contest resolution. First, we found that  
27 most of the literature focuses on linear measures of weapons, such as length. The few reports on  
28 weapon performance (e.g., biting force) were found only for Crustacea and Squamata. This bias  
29 highlights that measuring performance of weapons such as horns and spines might increase the  
30 breadth of our knowledge on weapons. Furthermore, we also found that linear measures  
31 showed stronger effects on contest success than performance measures. Second, we divided  
32 weapon function into displays and fighting style (i.e., how the weapon is used during fights).  
33 Regarding displays, most species displayed their weapons before contests (59.61%), rather than  
34 the body (34.61%). A minority (three species, 5.76%) engaged in fights without any type of  
35 display. Thus, species that bear weapons almost always perform displays before engaging in  
36 physical contact, a common hypothesis in contest theory that was never tested across taxa until  
37 now. Regarding fighting style, we found that most weapons were used for more than one  
38 behaviour during fights (e.g., squeezing and pushing). Further, pushing seems to be the most  
39 common behaviour among species, but it is usually accompanied by another behaviour, such as

40 lifting or squeezing. Thus, oversimplifying fighting style can bias results because some styles  
41 might impose contrasting biomechanical pressures (e.g., pushing vs squeezing). Third, we  
42 found that display type did not influence the importance of weapon size on contests. Fighting  
43 style, on the other hand, influenced the effect of weapon size on contest outcome significantly.  
44 Species that used their weapons to impact, pierce or squeeze showed smaller differences  
45 between winners and losers when compared to pushing or lifting (and multifunctional  
46 weapons). Thus, pushing and lifting seem important for selecting larger weapons – even though  
47 some of them might also be used for squeezing, piercing or impacting. Overall, our results show  
48 that we have a biased understanding of animal weapons, built mostly on weapon size alone.  
49 Further, our analyses show that the importance of weapon size differs depending on the  
50 fighting style. If we lessen those biases, we will have a better and broader understanding of how  
51 weapons evolve and diversify.

52

53 **Keywords.** Animal contests, morphological evolution, animal fighting, sexual selection, weapon  
54 biomechanics

## 55 CONTENTS

|    |                                                                   |    |
|----|-------------------------------------------------------------------|----|
| 56 | I. INTRODUCTION .....                                             | 4  |
| 57 | II. GENERAL PROCEDURES.....                                       | 8  |
| 58 | (1) Study selection and data gathering .....                      | 8  |
| 59 | (2) Effect size calculations and phylogenetic tree.....           | 9  |
| 60 | III. WHAT IS THE EFFECT OF DIFFERENT WEAPON TRAITS ON CONTEST     |    |
| 61 | RESOLUTION?.....                                                  | 11 |
| 62 | (1) Methods.....                                                  | 12 |
| 63 | (2) Results .....                                                 | 13 |
| 64 | (3) Discussion .....                                              | 14 |
| 65 | IV. ARE THERE SIMILARITIES AMONG SPECIES IN WEAPON FUNCTION?..... | 16 |

|    |                                                                  |    |
|----|------------------------------------------------------------------|----|
| 66 | <b>(1) Contest descriptions</b> .....                            | 17 |
| 67 | <i>(a) How do contests begin?</i> .....                          | 17 |
| 68 | <i>(b) How are weapons used during physical contact?</i> .....   | 19 |
| 69 | <b>(2) Results</b> .....                                         | 20 |
| 70 | <b>(3) Discussion</b> .....                                      | 20 |
| 71 | <b>V. DOES DISPLAY AND FIGHTING STYLE INFLUENCE WHICH WEAPON</b> |    |
| 72 | <b>COMPONENTS ARE IMPORTANT FOR CONTEST RESOLUTION?</b> .....    | 24 |
| 73 | <b>(1) Methods</b> .....                                         | 25 |
| 74 | <b>(2) Results</b> .....                                         | 26 |
| 75 | <i>(a) How do fights begin?</i> .....                            | 26 |
| 76 | <i>(b) How do weapons differ among fighting style?</i> .....     | 27 |
| 77 | <b>(3) Discussion</b> .....                                      | 27 |
| 78 | <b>VI. CONCLUDING REMARKS</b> .....                              | 28 |
| 79 | <b>VII. REFERENCES</b> .....                                     | 31 |
| 80 |                                                                  |    |
| 81 |                                                                  |    |

## 82 I. INTRODUCTION

83 Agonistic interactions have drawn attention from scientists since Darwin’s seminal publication  
84 of *The Descent of Man, and Selection in Relation to Sex* (Darwin, 1871). The field started mostly as  
85 descriptions of how animals engaged in agonism (e.g., Archer, 1988), but then gained a strong  
86 theoretical background by adding evolutionary game theory to its core (Maynard Smith & Price,  
87 1973). Building on that theory, the field currently focus on how individuals make decisions  
88 during agonistic interactions (Hardy & Briffa, 2013; Chapin, Peixoto, & Briffa, 2019), the  
89 evolutionary consequences of winning or losing (Filice & Dukas, 2019), and what traits affect  
90 winning chances (Vieira & Peixoto, 2013). Among these diverse topics, however, one subject  
91 frequently raised is the existence of specialized morphological structures used during contests  
92 (termed animal weapons, McCullough, Miller, & Emlen, 2016). A weapon can be seen as

93 specialized morphology used to gain mechanical advantage on the rivals (*sensu* Eberhard *et al.*,  
94 2018; see Table 1 for definitions), and because of this effect on the rival, weapons can affect all  
95 aspects of agonistic interactions. For instance, rivals may assess aspects of weapon size or  
96 performance when deciding whether to stay in or give up on the contest (Palaoro & Briffa, 2017;  
97 Pinto, Palaoro, & Peixoto, 2019). Weapons can also influence whether a contest escalate to  
98 physical fighting or not (Számadó, 2008). A myriad of studies have already shown that weapons  
99 are important for contest resolution, but most of them focus on single species (Vieira & Peixoto,  
100 2013; Pinto *et al.*, 2019). Reviews on this topic provide diverse insights on weapon evolution  
101 because they contain extensive knowledge on the shapes and sizes of animal weapons (Emlen,  
102 2008; Rico-Guevara & Hurme, 2019). However, they lack quantitative information on selection  
103 pressures that may act on weapons. Due to this, it is necessary to integrate data of a wider  
104 diversity of species to estimate how weapons affect contests; hence providing a broader picture  
105 of the relative importance of weapons for contest resolution.

106         One major hurdle to assess the relative importance of weapons is the large diversity of  
107 measures used as proxies of weapon traits (Vieira & Peixoto, 2013). For instance, weapon traits  
108 may be divided into three major categories: performance (such as a weapon's capacity to exert  
109 force), size (such as weapon mass or length), and shape (such as the ratio between weapon  
110 length and width). Although all of them may be important for determining the winner, there is  
111 a debate on which trait(s) should influence contests the most (Eberhard *et al.*, 2018; Palaoro *et al.*,  
112 2020). If one trait is more important than the others, we can expect stronger selective pressure  
113 on that trait. However, a systematic review on how different weapon traits affect winning  
114 chances is still lacking. A first step would be to identify the existing patterns on how studies are  
115 measuring the traits of different weapons to assess if there are any gaps or potential biases in  
116 our knowledge. The second step would be to quantify the relative importance of each weapon

117 trait for contest resolution. For example, if performance is more important than size for victory,  
118 we expect larger differences between winners and losers on proxies of weapon performance  
119 (such as weapon muscle mass) when compared to proxies of weapon size (such as weapon  
120 length).

121 Another point frequently raised in studies of weapon evolution is related to how the  
122 function of the weapon should influence the importance of each weapon trait on winning  
123 contests (McCullough, Tobalske, & Emlen, 2014; McCullough *et al.*, 2016, see Table 1 for  
124 definitions). Before physical contact, for instance, individuals may vary on whether they use  
125 their weapons as displays or not. Rivals can either use their weapons before the fight as threat  
126 displays (Lappin *et al.*, 2006), or use their weapons only during physical contact (Katsuki *et al.*,  
127 2014). Weapons also vary in how they are used during fights, i.e., fighting style (*sensu*  
128 McCullough *et al.*, 2016). For instance, individuals may use weapons to push (Graham, Padilla-  
129 Perez, & Angilletta, 2020), squeeze (Dennenmoser & Christy, 2013), pierce (Candaten *et al.*,  
130 2020), or even lift and throw their rivals away from the contested resource (Goyens, Dirckx, &  
131 Aerts, 2015). Due to this variation, fighting styles have been notoriously difficult to assess  
132 precisely. However, without a standardized framework to assess weapon function, we cannot  
133 identify potential differences in the selective pressures on weapon traits that may be related to  
134 the way rivals use their weapons during contests. For this, it is also necessary to perform a  
135 systematic review of how individuals use their weapons during contests; then test whether  
136 different fighting styles are able to predict how important each weapon trait is for contest  
137 resolution.

138 A crucial step to perform a systematic review to estimate the importance of weapons in  
139 contest resolution is to quantify how weapon traits affect winning chances. One way to obtain  
140 such quantification is to estimate how much winners and losers differ in a given weapon trait

141 (e.g., weapon size or performance). However, since different species may differ in how much a  
142 given weapon trait varies or in the type of measure that can be done, the estimation of the  
143 relative difference in weapon traits among winners and losers must be standardized to be  
144 comparable. In particular, the standardized mean difference in weapon traits between winners  
145 and losers is a powerful metric frequently used in ecology and evolution (i.e., Hedges'  $g$  effect  
146 size, Nakagawa & Cuthill, 2007): larger standardized mean differences between the groups  
147 indicate a stronger effect of the measured trait or variable. When applied to animal contests, it  
148 would be expected that traits that are more important in resolving contests should show  
149 marked differences between winners and losers, while traits that are less important should be  
150 more similar between rivals (e.g., Vieira & Peixoto, 2013). Therefore, as specific weapon traits  
151 become more important to determine contest resolution, the greater should be the difference in  
152 such traits between winners and losers.

153         Here, our goal is to quantify the importance of weapon traits and fighting style on  
154 contest resolution. For this, we performed a meta-analytical review to answer the following  
155 questions: 1) Are there biases in how weapons are measured and do distinct traits differentially  
156 influence contest resolution? 2) How much variation exists in weapon function and are there  
157 similarities among species? 3) Do similarities in displays and fighting style influence the relative  
158 importance of weapon traits in contests? Below we provide a general description of how we  
159 gathered information to answer these questions and then present our rationale and findings for  
160 each question separately.

161

## 162 II. GENERAL PROCEDURES

163 Below we describe how we searched for the articles used in this review, how we extracted and  
164 transformed the information obtained from the articles and how we controlled for phylogenetic  
165 effects in each analysis. Such procedures were the same to obtain the data used to answer our  
166 three questions. Specific procedures adopted for each question are separately described in the  
167 corresponding section.

168

### 169 (1) Study selection and data gathering

170 We searched for articles using the Web of Science (<https://www.webofknowledge.com>) and  
171 Scopus (<https://scopus.com>) using their core collection databases from 1945 to 2019. For both  
172 searches we used the following keywords: “contest\*”, “fight\*”, “assessment\*”, “resource  
173 holding p\*”, “resource-holding-p\*”, “agonis\*”, “territory defen\*e”, “weapon\*”, “armament\*”,  
174 “sexual\* trait\*”, “sexual\*-selected trait\*” “body size\*”, “antler\*”, “horn\*”, “jaw\*”, “claw\*”. All  
175 keywords were used with the “OR” Boolean operator. During our search, we excluded all  
176 studies in which the species did not bear a weapon (Table 1) such as butterflies and dragonflies.  
177 Since we had to classify species according to how individuals use them during contests, we  
178 excluded all species in which the behaviours adopted during the contests were undescribed.

179 For the selected studies, we collected information about mean values (and their  
180 corresponding variation) of weapon measures for winners and losers of contests. Within each  
181 study, we also recorded the pairing method used by researchers. We distinguished between  
182 studies in which fighting individuals were experimentally paired to have similar body sizes but  
183 differing weapon sizes and studies in which individuals were randomly chosen to contest (we  
184 also included in this second group studies in which one individual was free to choose their



185 rivals). Further, we found no studies that paired individuals by weapon size and let body sizes  
186 differ; thus, we use 'paired contests' to refer to contests where individuals have similar body  
187 sizes, but differing weapon sizes. Another confounding effect might come from resource value  
188 (*sensu* Arnott & Elwood, 2008): individuals that value more a resource often are more motivated  
189 to fight regardless of their fighting ability and have a higher chance of winning (e.g., Palaoro *et*  
190 *al.*, 2017). Therefore, to avoid any bias related to resource value, we only included the  
191 treatments in which there was no evidence that individuals had different motivations to fight.  
192 We also recorded whether the study was performed in a laboratory environment or in the wild.

193 We obtained a total of 1108 papers through those searches. We also added 30 relevant  
194 papers cited in reviews that we did not find in our primary searches (Emlen, 2008; Vieira &  
195 Peixoto, 2013; Pinto *et al.*, 2019; Rico-Guevara & Hurme, 2019). After excluding papers that did  
196 not provide all necessary information (Fig. S1), our final data set comprise 48 papers that  
197 contained 52 species, comprising both vertebrate and invertebrate species (Fig. S2). Within  
198 these, we had information for 33 species involving randomly paired rivals and 27 species  
199 involving rivals paired by size (Fig. 1). We performed all steps of the literature review following  
200 the PRISMA protocol (Liberati *et al.*, 2009), and the flow diagram containing all steps can be  
201 found in Fig. S1.

202

## 203 **(2) Effect size calculations and phylogenetic tree**

204 To compare the magnitude of trait differences between winners and losers across different  
205 species, we used Hedges' *g*, which is a standardized dimensionless measure that allows  
206 comparisons among different types of measurements and species (Koricheva, Gurevitch, &  
207 Mengersen, 2013). To calculate Hedges' *g*, we used the mean trait values, their standard

208 deviations, and respective sample sizes for each trait measure (such as weapon mass or weapon  
209 length) of winners and losers of each selected study. Since we always calculated the Hedges'  $g$   
210 as the difference between winner and loser traits, values greater than zero indicate that winners,  
211 on average, have a greater trait value than losers; while values smaller than zero indicate that  
212 losers have, on average, a lower trait value than winners. Unfortunately, mean values and  
213 standard deviations were not always available on papers. In those cases, we gathered results  
214 from statistical tests comparing winners and losers (e.g.,  $t$ -values,  $F$ -values, degrees of freedom,  
215 and sample sizes) to transform the statistical results into Hedges'  $g$  values using the package  
216 "*compute.es*" in R (Del-Re, 2013). Whenever the mean and standard deviations were displayed  
217 on graphs, we used the *webplotdigitizer* software to extract the values directly from the figures  
218 (Rohatgi, 2019). If none of those options were available, we contacted the corresponding author  
219 to request the data.

220 To control for the phylogenetic relatedness between the species in our sample, we built a  
221 phylogeny comprising all 52 species (Fig. S2) using the Interactive Tree of Life online tree  
222 generator (iTOL; <https://itol.embl.de/>). After generating the tree, we estimated branch length  
223 using a Brownian motion model of evolution to simulate an ultrametric phylogenetic tree  
224 (Paradis, Claude, & Strimmer, 2004). We then transformed the ultrametric tree into a variance-  
225 covariance matrix that reflects the phylogenetic relatedness among the species. The variance-  
226 covariance matrix was then imputed in our meta-analytical models (see below for a detailed  
227 description of each model) as a random variable. We made these procedures using the packages  
228 "*rotl*" (Michonneau, Brown, & Winter, 2016) and "*ape*" in R (Paradis *et al.*, 2004).

229

### 230 III. WHAT IS THE EFFECT OF DIFFERENT WEAPON TRAITS ON CONTEST

#### 231 RESOLUTION?

232 Weapons can be measured regarding their performance, size, and shape; each of these traits can  
233 be used as proxies for fighting ability (see Vieira & Peixoto, 2013 and Palaoro *et al.*, 2020b). This  
234 diversity of measures sparked interest on whether (and how) distinct weapon traits may affect  
235 contest resolution (Lappin & Husak, 2005; McCullough *et al.*, 2016; Eberhard *et al.*, 2018; Palaoro  
236 *et al.*, 2020). Given the important role weapons play in deciding a contest winner, understanding  
237 if each trait influences contest resolution is thus an important step to reveal how selective  
238 pressures may have acted on weapon evolution. In particular, if specific weapon traits are more  
239 important in determining victory, they should show greater differences between winners and  
240 losers when compared to weapon traits that are less important. For this reason, we used a meta-  
241 analytic review to assess how weapon traits are measured in studies on contest resolution; and  
242 tested if the difference between winners and losers changed according to the type of  
243 measurement made.

244 We divided the traits measured in six categories: weapon asymmetry, index of weapon  
245 size, weapon area, weapon performance, weapon linear measures (length or width), and  
246 weapon mass. Weapon asymmetry is often measured as the difference in size between the two  
247 sides of a bilateral weapon, e.g., the difference in the maxillae of a cricket (Briffa, 2008). The  
248 index of weapon size is used to calculate the size of a complex shape, i.e., to incorporate the  
249 complexity of branching of the antlers of a deer species into a metric of overall size (Hoem *et al.*,  
250 2007). Within performance, we considered only measures related to force output, such as  
251 muscle size and bite force measurements. Regarding area, linear measures, and mass, although  
252 they might represent the same component of a weapon (i.e., size), they have different scaling  
253 properties that can add non-random biases to the estimates (see Houle *et al.*, 2011; Pélabon *et al.*,

254 2014). In addition, in Arthropods, while mass may vary with individual condition, size is a fixed  
255 attribute in adults (e.g., Peixoto & Benson, 2008). Therefore, we separated linear from area and  
256 mass measurements.

257

## 258 **(1) Methods**

259 After determining the type of trait measured for each species, we built a multilevel meta-  
260 analytical model using the type of trait as our moderator, the Hedges'  $g$  effect size as our  
261 response variable, and the inverse of the variance of Hedges'  $g$  as a weight. We also included  
262 five variables as random effects. First, we used 'study ID' because sometimes we extracted more  
263 than one effect size per study. In this random effect, we frequently had several traits of the same  
264 weapon being measured (e.g., linear and mass measurements within the same study). Thus, we  
265 build a correlation matrix for the 'study ID' random effect because the correlation between  
266 effect sizes can bias the outcome (e.g., Weaver *et al.*, 2018; Mathot, Dingemanse, & Nakagawa,  
267 2019). The correlation matrix had the Pearson's correlation coefficient between different  
268 weapons traits to control for any allometric effect on our estimates. We found most of the  
269 correlations in the same papers from which we found the effect sizes. But, for those that we did  
270 not find, we searched the literature and used Pearson's coefficients in the papers cited in Table  
271 S1. In the few cases in which no information was available, we used 0.5 as a coefficient value  
272 (following Weaver *et al.*, 2018). The matrix we used can be assessed together with our codes and  
273 dataset (check the Data Availability section). Second, we used 'species ID' to account for effect  
274 sizes that came from the same species, but different studies. Third, we used the environment in  
275 which the original study was performed (i.e., laboratory or wild). Fourth, we used a matrix  
276 containing the phylogenetic relatedness among species. Finally, we used the pairing system

277 used in the original study (i.e., whether individuals were paired according to their body size or  
278 not).

279 To estimate heterogeneity and biases in the model, we used two approaches. First, we  
280 calculated the ratio of heterogeneity to the total variation observed across effect estimates in  
281 multivariate studies ( $I^2$ , Borenstein, 2009). We also partitioned the  $I^2$  into the contribution of  
282 each random variable (Nakagawa & Santos, 2012). Thus, we had estimations of the within-  
283 studies variance ( $I^2_{\text{study}}$ , similar to most mixed models), the species ID variance ( $I^2_{\text{species}}$ ), the  
284 phylogenetic variance ( $I^2_{\text{phylogeny}}$ ), and the pairing method variance ( $I^2_{\text{pairing}}$ ). The sum of these  
285 different  $I^2$  are equal to the total variance observed ( $I^2_{\text{total}}$ ). To estimate the phylogenetic signal in  
286 the effect size, we also calculated the phylogenetic heritability index,  $H^2$ , which is similar to  
287 Pagel's  $\lambda$  (Nakagawa & Santos, 2012). Finally, to test for publication bias, we conducted a  
288 modified version of the Egger's test, in which we used the residuals of our meta-analytic model  
289 as the response variable and the standard deviation of the effect sizes as our predictor variable  
290 (Egger *et al.*, 1997). If the intercept of this regression is not different from zero ( $\alpha > 0.10$ ), then  
291 there is little evidence for publication bias (Nakagawa & Santos, 2012).

292

## 293 (2) Results

294 Linear measures were the most common trait found in the literature (74 out of 107 effect sizes,  
295 69.15%). Performance measures were the second most common with 23 effect sizes (21.49%),  
296 followed by area ( $n = 4$ , 3.73%), asymmetry ( $n = 3$ , 2.88%), mass ( $n = 2$ , 1.87%), and index  
297 measures ( $n = 1$ , 0.9%). Linear measures were found for most species in the sample, but  
298 performance measures were concentrated on crustaceans and lizards. Of the 23 effect sizes on  
299 performance, 11 came from crustaceans (47.8%), 11 from lizards (47.8%) and 1 from a cricket

300 (*Teleogryllus commodus*, Fig. 1). Therefore, there is a clear bias on the type of inference drawn for  
301 most groups: inferences still rely mostly on size measures, rather than performance, or other  
302 measures.

303 The low sample sizes for measures of weapon area, asymmetry, mass, and index would  
304 render any statistical assessment of their influence on contest success weak. Thus, we removed  
305 these measures from our sample and only tested the linear and performance measures. Overall,  
306 winners had greater weapon traits than losers regardless of whether linear or performance was  
307 measured ( $QM_2 = 117.05$ ,  $p < 0.0001$ ). However, linear measures had a greater effect on contest  
308 success than performance measures ( $QM_1 = 23.29$ ,  $p < 0.0001$ ; Fig. 2). The model showed low  
309 heterogeneity. Study ID and pairing method were responsible for most of that heterogeneity,  
310 while phylogeny and genus had negligible effects on variance (Table 2). We found evidence for  
311 publication bias on the effect sizes (Egger's test; intercept: -0.315, 95% CI: -0.569, -0.06,  $t = -2.461$ ,  
312  $p = 0.015$ ).

313

### 314 (3) Discussion

315 Our results suggest that linear measures have a higher relative importance to determine contest  
316 outcome than performance measures. Therefore, different traits of the weapon may provide  
317 distinct information about the relative importance of weapons in contests. Given recent  
318 evidence (e.g., Palaoro *et al.*, 2020b; Emberts *et al.*, 2021), it is somewhat surprising to find that  
319 weapon size is more important than weapon performance on contest resolution. However,  
320 interpreting these results requires caution because of the biases and limitations of the current  
321 literature. For instance, performance measures are concentrated on crustaceans and lizards  
322 (only one performance measure was found outside those two groups). These measures provide

323 information on the performance of weapons that have very similar morphologies: claws and  
324 jaws. Meanwhile, linear measures have a wider diversity of weapons, such as antlers,  
325 mandibles, and horns, which are also distributed among more taxa. Therefore, to ensure that  
326 the effect we found is not an artifact associated with differences in the diversity of weapons that  
327 have linear and performance measures, we reran the analysis using only data gathered from  
328 crustaceans and lizards. The result was the same to that observed in the analysis considering all  
329 species: the effect size of linear components was higher than the effect size of performance  
330 components (Fig. S4). Thus, despite the bias in the diversity of weapons, it seems that linear  
331 measures are more important for contest resolution than performance measures.

332         One explanation for why linear measures seem more important than performance  
333 measures may reside on engaging the rival from a safe distance (Eberhard *et al.*, 2018). Being  
334 able to handle the rival without being exposed can also give the individual more time align the  
335 weapon relative to the rival's weapon or body without incurring any extra costs (fighting skill,  
336 Briffa & Lane, 2017). If that is true, then any weapon can benefit from being larger. However,  
337 that may be particularly true for weapons that can push the rival (even if pushing co-occurs  
338 with other behaviours, see the next session). That way, the individual that has more time to find  
339 a better spot to lock on the rival and enjoy an increased chance to win the contest by pushing  
340 the opponent better. Thus, individuals might benefit from having a larger weapon, regardless of  
341 their weapon morphology. Alternatively, weapons might be used as visual displays and during  
342 fights to gain mechanical advantage on the rival. These selective pressures combined could  
343 favour bigger weapons if size influences contest success by getting rivals to retreat before  
344 physical contact (McCullough *et al.*, 2016). We tackle this hypothesis in the next sessions.

345         Along with the lack of measurements of performance during fights, there is a clear  
346 information gap on the performance of weapons that are used for other types of behaviours,

347 such as striking or ramming. The only example outside of biting performance we have on our  
348 dataset are the bullet-fast strikes of mantis shrimps (Green & Patek, 2015). Most of the types of  
349 weapons where we miss information on other measures are, in fact, weapons that do not have  
350 specific muscles attached to them, such as antlers, horns, and spines. These weapons are used  
351 for a multitude of behaviours during fights (see next session) and rather than having their own  
352 movement (i.e., biting, striking), they are used simultaneously with body movement. A few  
353 studies show how to measure the performance of horns (McCullough, 2014) and spines (Crofts  
354 *et al.*, 2019) during relevant tasks. Thus, expanding our knowledge to how much these  
355 performances influence contests can broaden our understanding of weapon evolution.

356

#### 357 **IV. ARE THERE SIMILARITIES AMONG SPECIES IN WEAPON FUNCTION?**

358 Weapon function may be composed of two moments. In the first moment (not present in some  
359 species, see below), individuals may use their weapons as displays before physical contact  
360 ensue. In the second moment, individuals use their weapons to manipulate the rival, which is  
361 referred here as fighting style (*sensu* McCullough *et al.*, 2016). Both moments can vary broadly  
362 within and between species. For instance, in the fiddler crab, *Austruca mjoebergi*, males use their  
363 claws as threat displays before physical contact. If the contest escalates, males use their claws to  
364 pinch rivals; while pinching, males are also trying to lift rivals off the ground and shove them  
365 away (Dennenmoser & Christy, 2013). In other species of crustaceans, such as crayfish, claws  
366 are used not only to pinch but also to push rivals (Graham *et al.*, 2020). Perhaps because of this  
367 variation, weapon function has seldom been comparatively investigated across different taxa. In  
368 the few groups this has been done (e.g., bovids, Caro *et al.*, 2003) such variation has been  
369 eliminated by linking fighting style of a species to a single behaviour (and discarding displays).



370 However, since the behaviour adopted may change, ascribing fighting style to a single  
371 behaviour may underestimate the importance of the weapon for contests success and restrict  
372 our comprehension about the selective forces that act on weapon evolution. For this reason,  
373 here we reviewed the behaviours adopted during the fight for the species selected in our meta-  
374 analysis, which include both vertebrates and invertebrates. We also identified if there are  
375 groups of species that show similar weapon functions based on more complete descriptions of  
376 fighting behaviour.

377

### 378 **(1) Contest descriptions**

379 For each species selected in our meta-analysis, we searched for information on weapon  
380 function. When the selected article did not provide descriptions of fighting behaviour, we  
381 searched for additional articles that contained detailed descriptions of the fighting behaviour  
382 (Supplementary File S2). Based on the exact descriptions provided in the literature, we were  
383 able to identify general categories of how contests begin and how the weapon is used during  
384 physical contact (i.e., fighting style).

385

#### 386 *(a) How do contests begin?*

387 We classified species in three groups according to how contests begin. First, we found species in  
388 which individuals perform behaviours that allow them to gather information about the rival's  
389 body size before engaging in contests. For instance, in the cricket *Melanotes ornata*, males lash  
390 their antennae toward the rival's body before deciding whether to use their legs to kick the rival  
391 (Lobregat *et al.*, 2019). In the lizard *Carinascincus microlepidotus*, on the other hand, males turned

392 sideways towards the rival and performed dorso-lateral displays of the body before escalating  
393 to physical contact (Olsson & Shine, 2000). We named this category ‘body size estimation’  
394 because individuals had a chance to assess their rivals body given their displays and antennae  
395 touch, but they did not necessarily have threat displays exclusively involving the weapon  
396 (following Számádó, 2008). Second, we found species in which individuals perform behaviours  
397 that allow them to gather more precise information about their rivals’ weapons before engaging  
398 in physical contact. For example, in the crayfish *Cherax dispar*, individuals display their enlarged  
399 front claws (which is used as a weapon) to one another before making physical contact, which  
400 allow a visual estimation of weapon size (Wilson *et al.*, 2007). Grasshoppers also used similar  
401 behaviours in which they flare their mandibles to the rivals before engaging in physical contact  
402 (Umbers *et al.*, 2012). We named this category ‘weapon display’ because rivals had the  
403 opportunity to assess the size of the rival’s weapon (or be threatened by the rival’s weapon, see  
404 Számádó, 2008). Third, there were species that did not perform explicit behaviours that would  
405 allow rivals to gather information about body or weapon size before engaging in physical  
406 contact. An example is the *Sagra femorata* beetle, in which rivals do not use any type of display  
407 before beginning a physical struggle (Katsuki *et al.*, 2014; O’Brien & Boisseau, 2018). We named  
408 this category ‘no display’ because there was no evidence that rivals gather information or  
409 threaten each other before contests ensue. Although we cannot exclude the possibility that  
410 rivals gather information during the physical contact phase, we assure that the decision to begin  
411 a contest in the group of ‘no display’ is little or not affected by mutual evaluations performed  
412 before rivals engage in a physical struggle. The full descriptions of contest behaviours for all  
413 species can be checked in Supplementary File S2.  
414

415 (b) *How are weapons used during physical contact?*

416 We identified six categories which relate to fighting style: (i) to lift; (ii) to push; (iii) to pull; (iv)  
417 to squeeze; (v) to deliver forceful impact blows; (vi) to pierce. Lifting weapons were mainly  
418 used to lift the rival from the substrate to either disbalance or topple the rival. For instance, the  
419 stag beetle *Cyclommatus metallifer* uses enlarged mandibles to hold and lift the rival off the tree  
420 trunk in which they frequently fight on (Goyens *et al.*, 2015). Pushing weapons were used to  
421 push the rival away from the bearer. For instance, dung beetles that fight inside tunnels use  
422 their horns to push rivals off the entrance of the tunnels (McCullough & Simmons, 2016).  
423 Pulling weapons were used to pull the rival near the bearer, frequently dislodging it. For  
424 instance, *Aegla longirostri* freshwater anomurans use their claws to pinch and pull the rivals,  
425 dislodging them from the substrate (Ayres-Peres, Araujo, & Santos, 2011). This behaviour is  
426 rarely performed without squeezing. Squeezing weapons were mainly used to provide forceful  
427 grasp on a rival. Crustaceans and lizards are the frequent examples of this category, using their  
428 claws and jaws to squeeze rival's body parts (Husak, Lappin, & Van Den Bussche, 2009;  
429 Dennenmoser & Christy, 2013). Impact weapons were used to deliver rapid or explosive strikes  
430 to the rival. A noteworthy example is the raptorial appendages of mantis shrimps, which are  
431 used to strike the rival's telson with a movement so fast that it can crack the abdomen's cuticle  
432 (Green & Patek, 2015 but see Taylor & Patek, 2010). Lastly, piercing weapons were used mainly  
433 to pierce the rival's skin or cuticle, typically with sharp, pointy structures. One example is the  
434 bird *Ficedula hypoleuca* which uses its beak to pierce the rival's skin during physical contact  
435 (Dale & Slagsvold, 1995).

436 It is important to note that, despite these six different functions, most species used their  
437 weapons for two or, more rarely, three functions during the fight. For example, in the cricket  
438 *Loxoblemmus doenitzi*, males have a flat head with horns on the edges that are used during fights

439 to push one another. However, males may also use the horns to rapidly beat the rival's horns or  
440 body (Kim, Jang, & Choe, 2011). Therefore, for species in which more than one weapon usage  
441 was described, we created categories with all the functions associated with that weapon. In our  
442 example, we consider that males of *L. doenitzi* use their weapons for both pushing and  
443 impacting their rivals.

444

## 445 (2) Results

446 Based on the combination between how contests begin and how weapons are used during  
447 contests we identified 16 categories of weapon function distributed among the 52 species (Table  
448 3). According to the descriptions we gathered, contests frequently began by individuals  
449 displaying their weapons to rivals (n = 32 species out of 52, 61.53%); less frequently by  
450 displaying their body size (n = 17 of 52 species, 32.69%); and rarely by not making any display  
451 (n = 3 of 52 species, 5.76%). Regarding function during fights, most weapons are used for more  
452 than one function (n = 36 of 52, 69.23%), while few are used for a single function (n = 16 of 52,  
453 30.76%). Regardless of whether we count multifunctional weapons, or weapons with a single  
454 function, squeezing is the most common function (35), followed by pushing (23), lifting (15),  
455 impacting (15), pulling (3), and piercing (2). To see how each species was categorized, see Fig. 1;  
456 for complete descriptions, see Table 3.

457

## 458 (3) Discussion

459 According to contest theory, displays should be favoured in animals that frequently engage in  
460 contests as a mechanism to decrease the costs of aggression (Emlen, 2008). By displaying (the

461 weapon or the body), an individual might induce the rival to give up on the contest even before  
462 they started - thus saving energy. That is why displays should be favoured across all animals:  
463 they decrease the likelihood of injuries and increase the amount of energy saved (Hardy &  
464 Briffa, 2013). Our result is the first to corroborate the theoretical prediction for a directional  
465 selection for displays using a diverse group of animals: we showed that displays are  
466 commonplace among fighting animals. That seems especially true for weapon displays, which  
467 is well distributed among all functions (Table 3) and hence does not seem subject to  
468 oversampling of any given taxa. Further, displaying the weapon is more common than body  
469 displays. Therefore, we have shown that selection seems to be acting to decrease the costs of  
470 aggression across animals by favouring contests that begin with displays, rather than  
471 instantaneous aggression (Emlen, 2008).

472         In the three cases that we found no displays, three opposite explanations arise. First,  
473 animals might escalate all contests if resource value is extremely high. In the case of the male  
474 hermit crabs *Diogenes nitidimanus*, for instance, males guard the females by grasping the outer  
475 rim of her shell and carrying her around (Yoshino, Koga, & Oki, 2011). If that male loses the  
476 possession of the female in a contest, it is likely it will not mate until the next reproductive  
477 cycle. Access to mature females is thought to be difficult in *D. nitidimanus* because females are  
478 only receptive during very short time windows (only after molting, Asakura, 1987). Thus, males  
479 holding females might opt to go all-in in a fight to keep the female, similar to predictions from  
480 the 'Desperado' effect (Grafen, 1987). Second, if the costs of fighting are very low, there might  
481 be no selection to avoid fighting and decrease the costs. However, the three species in our  
482 sample (*Trypoxylus dichotomus*, *Sagra femorata*, *D. nitidimanus*) have enlarged weapons (i.e.,  
483 disproportional size in relation to body size, Yoshino *et al.*, 2011; Johns *et al.*, 2014; O'Brien,  
484 Katsuki, & Emlen, 2017). Thus, it is unlikely that these species are evolving weapons because

485 contests have very low costs. The third explanation resides on a possible lack of details in  
486 behavioural descriptions of fighting behaviour. Those might be unconscious biases, such as  
487 focusing on what animals are doing during the fight and not when the fight is starting, or subtle  
488 signalling behaviours that are outside the observer's sensory cognition. For instance, rhinoceros  
489 beetles can use acoustic signals during courtship that were unknown until recently (Hunt *et al.*,  
490 2020). Thus, it is possible that these species indeed use displays, but we were not able to assess  
491 them yet.

492         Squeezing was the most common behaviour, followed by pushing. While squeezing can  
493 be considered a bias because of the oversampling of crustaceans and lizards (both with  
494 squeezing weapons), pushing is also common behaviour during fights, although in many  
495 instances it is associated with another behaviour. As shown in Table 3, pushing was found  
496 associated with another behaviour in 31 (of 34 records), being used as the only fighting  
497 behaviour only in three species. Thus, pushing is one of the main reasons most weapons are  
498 multifunctional. It is interesting to note that, in most species, pushing is associated with  
499 squeezing – which is a similar pattern to the vectorially opposite behaviour, pulling.  
500 Individuals are unable to pull a rival without holding the rival. Pushing, however, can be done  
501 simply by contacting the individual (e.g., interlocking antlers used to push). Thus, despite these  
502 differences, it seems that squeezing might increase the chance that an individual also tries to  
503 manipulate the rival by pulling or pushing.

504         Piercing, on the other hand, is the rarest behaviour in our sample. The only species that  
505 displayed that behaviour in our sample was *Ficedula hypoleuca*, a bird that pecks its rivals during  
506 fights (Dale & Slagsvold, 1995), and *Tetranychus urticae*, a mite species in which individuals use  
507 their stylets to pierce rivals (Potter, Wrensch, & Johnston, 1976). Other species, such as  
508 hummingbirds (Rico-Guevara & Araya-Salas, 2015) and coreid bugs (Emberts *et al.*, 2021), can

509 use piercing as their fighting style, but even among them few groups use piercing. Piercing is  
510 indeed expected to be rare because it might be injurious. Over evolutionary time, theory  
511 predicts that species would tend to evolve displays to decrease the likelihood of engaging in  
512 injurious contests, unless resource value is extremely high (Hardy & Briffa, 2013). By evolving  
513 displays, weapons would then tend to increase in size and complexity, which could decrease  
514 piercing performance and change the function of the weapon altogether (Emlen, 2008;  
515 Anderson, 2018). A similar route is believed to have occurred in cervids, where short, pointy  
516 antlers started to increase in size and complexity as species evolved (Barrette, 1977; Caro *et al.*,  
517 2003; Davis, Brakora, & Lee, 2011). Our results show that using displays before fights is indeed  
518 a common strategy among animals (Table 3), but we still need to test whether these displays  
519 decrease the injury capacity of weapons over evolutionary time.

520 Another important pattern is that the fighting style of most species (65%) are comprised  
521 of multiple behaviours. Since fights tend to involve ritualized behaviours (Hardy & Briffa,  
522 2013), it seems improbable that the description of a weapon being used in more than one  
523 behaviour occurred by chance. Therefore, it seems that there is a higher tendency for weapons  
524 to be used for more behaviours. Perhaps more complex fighting styles increase the winning  
525 chances because it gives more options for individuals to inflict costs on their rivals. But at the  
526 same time, depending on the combinations of behaviour, this may also generate opposing  
527 selective forces on weapon morphology. For example, weapons used for lifting and pushing  
528 will probably favour a single morphological type that provides an efficient way to fit the  
529 weapon on the rival and a strong body to work as a lever for the weapon to work properly.  
530 Weapons used for impacting and pushing, on the other hand, should favour a strong structure  
531 that is capable of delivering high forces, but a different morphology for pushing the rival.  
532 Perhaps, the occurrence of opposite selective forces acting on weapons explains why some

533 functional combinations are not described (Corn *et al.*, 2021). Further, if some behaviours tend to  
534 involve multiple non-weapon parts (e.g., lifting uses the legs and body), while others are  
535 essentially a weapon movement (e.g., squeezing), perhaps these behaviours should not be  
536 considered equally when weapon evolution is concerned. On the one hand, the distinct selective  
537 forces on some functions might promote weapon diversification (Wainwright *et al.*, 2005; Polly,  
538 2020). On the other hand, the weapon is primarily used solely in some behaviours. The full  
539 breadth of these possibilities remains to be investigated.

540

#### 541 **V. DOES DISPLAY AND FIGHTING STYLE INFLUENCE WHICH WEAPON**

#### 542 **COMPONENTS ARE IMPORTANT FOR CONTEST RESOLUTION?**

543 As shown in the previous section, species differ in how they begin contests and in how they use  
544 their weapons during fights. Given this variation, it is possible that displays and fighting style  
545 affect which traits are more important to increase contest success. In particular, it may be that,  
546 in species that display their weapons before engaging in physical contact, greater weapon size  
547 increases the chance of contest success because weapon size would deter most rivals from  
548 fighting. For species that instead assess body size, not weapon size, differences in weapon size  
549 might have a more important role during fight than before physical contact ensues. Therefore,  
550 in species that use body size displays, the difference between winners and losers in weapon size  
551 should be lower than in species that use weapon displays. Finally, in species that do not use any  
552 type of display before fighting, weapons may still be important in determining victory. The  
553 absence of a display prior to physical contact may relax the selective pressure on weapon size,  
554 but may increase the selection acting on performance depending on fighting style.



555           Regarding fighting style, it is possible that differences in how a weapon is used affects  
556 the relative importance of weapon size on contest resolution. For species that use weapons to  
557 lift or push rivals, reach should be important to decide who wins the contest. Basically, larger  
558 weapons allow the individual to touch its rival before being touched. That allows the individual  
559 to attack without being exposed to a riposte. Thus, we can expect a large selective pressure on  
560 the size of the weapon for these two types of fighting (up to a certain mechanical limit, see  
561 McCullough, 2014). Squeezing, impact, or piercing, on the other hand, do not necessarily rely  
562 on size. Although weapon size may still be important (to attack first and due to allometric  
563 effects, Pélabon *et al.*, 2014), a larger weapon may not equate to a weapon that performs better.  
564 Crayfish, for instance, bear large claws that can be relatively weak for their overall size  
565 (Robinson & Gifford, 2019). Because weapon size may not determine its performance, it is  
566 possible that an individual with a smaller but stronger weapon can cause more injuries than an  
567 individual with a larger but weaker weapon. Therefore, we expect the mean difference in  
568 weapon size between winners and losers for weapons used to squeeze, impact, or pierce to be  
569 low.

570

## 571 **(1) Methods**

572 To analyse the differences in the type of display and fighting style, we performed two  
573 multilevel meta-analytical models using only the effect sizes for linear measurements. As can be  
574 seen in section III, the data on performance measures contain only Crustacea and Squamata  
575 (and one cricket), which biases the types of display and fighting style we observe. Thus, we  
576 used the type of display evaluated in the previous session as our moderator, the Hedges'  $g$   
577 effect size as our response variable, and the inverse of the variance of Hedges'  $g$  as a weight.

578 The rest of the model, such as its random effects, and how we assessed heterogeneity, are equal  
579 to the procedures described in session 3.1.

580 For the fighting style analysis, we used the descriptions on the previous section to  
581 categorize fighting style in three groups: (i) Size-emphasis; (ii) Performance-emphasis; (iii)  
582 Intermediate. The size-emphasis group consisted of weapons used to pull, push and lift rivals,  
583 including weapons with these two functions. The performance-emphasis group consisted of  
584 weapons used to squeeze, impact, pierce, or pull rivals. Again, if a weapon had two of these  
585 three behaviours simultaneously, we categorized it as 'performance-emphasis'. Any weapon  
586 used for two or more behaviours that belonged to two different groups (i.e., 'size' and  
587 'performance-emphasis'), was categorized as 'intermediate' (all species that used the weapons  
588 for three behaviours were included in this last category). For this multilevel meta-analytical  
589 model, we used the function group as our moderator. We used the same random effects and  
590 heterogeneity assessments described in session 3.1.

591

## 592 **(2) Results**

### 593 *(a) How do fights begin?*

594 Winners had larger weapons than losers regardless of the type of display on average ( $QM_3 =$   
595 28.48,  $p < 0.0001$ , Fig. 3), but the confidence interval overlapped zero when males did not use  
596 displays (Fig. 3). Further, the types of displays did not differ among themselves ( $QM_2 = 3.18$ ,  $p$   
597  $= 0.2$ ). The model showed low heterogeneity. Study ID and pairing method were responsible for  
598 most of that heterogeneity, while phylogeny and genus had negligible effects on variance (Table

599 4). We found evidence for publication bias on the effect sizes (Egger's test; intercept: -0.368, 95%  
600 CI: -0.656, -0.081,  $t = -2.553$ ,  $p = 0.012$ ).

601

602 (b) *How do weapons differ among fighting style?*

603 Winners were larger than losers in all categories, even though some of them had confidence  
604 intervals that slightly overlapped with zero ( $QM_3 = 107.72$ ,  $p < 0.0001$ , Fig. 4). We also found  
605 differences in the asymmetry between winners and losers among the categories. Weapons were  
606 more important for contest success in size-emphasis and intermediate fighting style when  
607 compared to performance-emphasis ( $QM_1 = 18.84$ ,  $p < 0.001$ ,  $QM_1 = 8.42$ ,  $p = 0.003$ ,  
608 respectively). The model showed low heterogeneity. Study ID and pairing method were  
609 responsible for most of that heterogeneity, while phylogeny and genus had negligible effects on  
610 variance (Table 5). We found evidence for publication bias on the effect sizes (Egger's test;  
611 intercept: -0.368, 95% CI: -0.656, -0.081,  $t = -2.553$ ,  $p = 0.012$ ).

612

### 613 (3) Discussion

614 Contrary to our expectations, there was no difference in weapon size between winners and  
615 losers among different types of display. Therefore, the existence of a weapon or body display  
616 before the physical contact phase does not seem to impose additional selective pressures on  
617 weapon size. This is interesting because visual displays are thought to be one important driver  
618 for increments in weapon size (O'Brien *et al.*, 2017; Eberhard *et al.*, 2018), and most of the species  
619 in our sample perform visual displays (Fig. 3).

620 On the other hand, the fighting style seems to impose different pressures on weapon  
621 evolution: the mean difference between winners and losers was higher for the “size-emphasis”  
622 and “intermediate” groups when compared with the “performance-emphasis” group.  
623 Therefore, it seems that, even if a weapon is also used for squeezing, piercing or impacting, the  
624 presence of an additional behaviour related to lifting or pushing will favour increases in  
625 weapon size. Perhaps lifting and pushing are important in multifunctional weapons because  
626 they allow an individual to reach the rival before being reached or to physically expel a rival  
627 from the defended resource. For instance, *Melanotes ornata* crickets, and fiddler crabs can use  
628 their weapons to throw their rivals away from the contested resource (Supplementary File S2).

629 It is important to highlight, however, that weapons have many different aspects that  
630 may affect how they impose costs on rivals during the contest (Palaoro & Briffa, 2017).  
631 Therefore, to reach a more comprehensive picture of how different weapon traits change  
632 according to fighting style it is necessary to gather information on many different weapon  
633 aspects - and many different weapon types. What is clear from our results is that species show  
634 marked differences in fighting style and that such differences have the potential to affect (at  
635 least for size) the way weapons evolve.

636

## 637 VI. CONCLUDING REMARKS

638 (1) Our data on 52 species of both vertebrates and invertebrates shows biases on how  
639 animal weapons are measured. Linear components, such as lengths and widths, are  
640 responsible for 69.15% of the information on the literature; performance components,  
641 such as bite force, for 21.49%; and any other measures such as weapon asymmetry,  
642 mass, or volume are rare.

- 643 (2) We also found significant bias on the taxa in which performance components are  
644 measured. Lizards and crustaceans (and one cricket species) are the only taxa in which  
645 we found measures of weapon performance (e.g., bite force) associated with winning or  
646 losing fights. Thus, there is a significant gap on how we perceive the importance of  
647 weapon performance to solve contests. To have a better idea of how performance is  
648 important, we need more information on the performance of weapons such as horns,  
649 antlers, and spines.
- 650 (3) Linear components of weapons were more associated with victory than performance  
651 components. This can be a corollary of the bias mentioned above, but our sensitivity  
652 analysis suggests that the effect is robust. One possible explanation is that size can allow  
653 individuals to handle rivals from a safe distance, regardless of the weapon type.  
654 Handling rivals from a safe distance can give the individual more time to get a tighter  
655 grip and increase their chance of winning the contest.
- 656 (4) The majority of species tend to begin contests by displaying their weapons to the rival  
657 (59.61%); a smaller portion either displays their body through movements or touch the  
658 rival with antennae or any other mechanosensory morphology (34.61%). A minority  
659 begins contests with no display at all (5.76%). Hence, as theory suggests, most species do  
660 begin contests by using displays.
- 661 (5) Few weapons were used for a single behaviour during contests (30.8%), most of them  
662 were used for two or more behaviours (69.2%). From those multiple behaviours,  
663 pushing rivals with the weapon is the most frequent co-occurring behaviour, suggesting  
664 that selection may not be working solely on a weapon's sole behaviour, but rather on the  
665 fighting style. Further, piercing is the rarest behaviour in our sample with only two  
666 species described with those weapons.

667 (6) We found no strong effect of type of display on the importance of weapon size on  
668 contest resolution. The only subtle difference we found was that, when displays were  
669 absent, weapon size did not differ between winners and losers. Given that most species  
670 in our sample perform some type of display, it suggests that displays may signal  
671 weapon size. However, we need more data from species that do not perform any type of  
672 display to understand the effect properly.

673 (7) Fighting style influences the importance of weapon size on contests. Weapons used to  
674 squeeze, impact or pierce had a lower difference between winners and losers when  
675 compared to weapon used for push, pull, or lift or weapons with multiple behaviours.  
676 Once again, it seems that being able to reach the rival first is important for contest  
677 success.

678

679 **Acknowledgments.** We thank Dr. Patrick Green for the suggestions on an earlier version of the  
680 manuscript. We thank all the authors who shared the raw data of their paper with us:  
681 Chatchawan Chaisuekul, Christine W. Miller, Devin O'Brien, Kate Umbers, Leilani Walker,  
682 Marcelo M. Dalosto, Murray Fea, Sarah E. Reece, Zach Stahlschmidt, Zachary Emberts, and  
683 Zackary Graham. We also thank Eduardo S.A. Santos for his help with the heterogeneity and  
684 bias analyses. A.V.P. thanks FAPESP for the post-doctoral grant (process no: 2016/22679-3).  
685 P.E.C.P. thanks Conselho Nacional de Desenvolvimento Científico e Tecnológico (CNPq  
686 produtividade em pesquisa 311212/2018-2) and Pesquisa e Desenvolvimento of Agência  
687 Nacional de Energia Elétrica and Companhia Energética de Minas Gerais (P&D  
688 ANEEL/CEMIG, PROECOS project GT- 599).

689 **Authors' contribution.** A.V.P and P.E.C.P. designed the study, A.V.P. collected the data and ran  
690 the analysis, A.V.P. and P.E.C.P. wrote the manuscript.

691 **Data availability.** All data and codes will be shared on github  
692 (<https://github.com/alexandrepaoro>) upon acceptance.

## 693 VII. REFERENCES

- 694 ANDERSON, P.S.L. (2018) Making a point: shared mechanics underlying the diversity of  
695 biological puncture. *Journal of Experimental Biology* **221**.
- 696 ARCHER, J. (1988) *The Behavioural Biology of Aggression*. CUP Archive.
- 697 ARNOTT, G. & ELWOOD, R.W. (2008) Information gathering and decision making about resource  
698 value in animal contests. *Animal Behaviour* **76**, 529–542.
- 699 ASAKURA, A. (1987) Population Ecology of the Sand-Dwelling Hermit Crab *Diogenes nitidimanus*  
700 Terao: 3. Mating System. *Bulletin of Marine Science* **41**, 282–288.
- 701 AYRES-PERES, L., ARAUJO, P.B. & SANTOS, S. (2011) Description of the Agonistic Behavior of  
702 *Aegla longirostri* (Decapoda: Aegliidae). *Journal of Crustacean Biology* **31**, 379–388.
- 703 BARRETTE, C. (1977) Fighting Behavior of Muntjac and the Evolution of Antlers. *Evolution* **31**,  
704 169–176.
- 705 BORENSTEIN, M. (2009) Effect sizes for continuous data. In *The Handbook of Research*  
706 *Synthesis and Meta-Analysis* (eds H. COOPER, L.V. HEDGES & J.C. VALENTINE), pp. 221–236.  
707 Russell Sage Foundation.
- 708 BRIFFA, M. (2008) Decisions during fights in the house cricket, *Acheta domesticus*: mutual or  
709 self assessment of energy, weapons and size? *Animal Behaviour* **75**, 1053–1062.
- 710 BRIFFA, M. & LANE, S.M. (2017) The role of skill in animal contests: a neglected component of  
711 fighting ability. *Proceedings of the Royal Society B: Biological Sciences* **284**, 20171596.
- 712 CANDATEN, A., POSSENTI, A.G., MAINARDI, Á.A., DA ROCHA, M.C. & PALAORO, A.V. (2020)  
713 Fighting scars: heavier gladiator frogs bear more injuries than lighter frogs. *Acta Ethologica*.
- 714 CARO, T.M., GRAHAM, C.M., STONER, C.J. & FLORES, M.M. (2003) Correlates of horn and antler  
715 shape in bovids and cervids. *Behavioral Ecology and Sociobiology* **55**, 32–41.
- 716 CHAPIN, K.J., PEIXOTO, P.E.C. & BRIFFA, M. (2019) Further mismeasures of animal contests: a  
717 new framework for assessment strategies. *Behavioral Ecology* **30**, 1177–1185.
- 718 CORN, K.A., MARTINEZ, C.M., BURRESS, E.D. & WAINWRIGHT, P.C. (2021) A Multifunction Trade-  
719 Off has Contrasting Effects on the Evolution of Form and Function. *Systematic Biology*.
- 720 CROFTS, S.B., LAI, Y., HU, Y. & ANDERSON, P.S.L. (2019) How do morphological sharpness  
721 measures relate to puncture performance in viperid snake fangs? *Biology Letters* **15**, 20180905.
- 722 DALE, S. & SLAGSVOLD, T. (1995) Female Contests for Nest Sites and Mates in the Pied  
723 Flycatcher *Ficedula hypoleuca*. *Ethology* **99**, 209–222.
- 724 DARWIN, C. (1871) *The descent of man, and selection in relation to sex*. John Murray, London.

- 725 DAVIS, E.B., BRAKORA, K.A. & LEE, A.H. (2011) Evolution of ruminant headgear: a review.  
726 *Proceedings of the Royal Society B: Biological Sciences* **278**, 2857–2865.
- 727 DEL-RE, A.C. (2013) *compute.es*: Compute Effect Size. R Package version 0.2-2. *R Package*.
- 728 DENNENMOSER, S. & CHRISTY, J.H. (2013) The Design of a Beautiful Weapon: Compensation for  
729 Opposing Sexual Selection on a Trait with Two Functions. *Evolution* **67**, 1181–1188.
- 730 EBERHARD, W.G., RODRÍGUEZ, R.L., HUBER, B.A., SPECK, B., MILLER, H., BUZZATTO, B.A. &  
731 MACHADO, G. (2018) Sexual Selection and Static Allometry: The Importance of Function. *The*  
732 *Quarterly Review of Biology* **93**, 207–250.
- 733 EGGER, M., SMITH, G.D., SCHNEIDER, M. & MINDER, C. (1997) Bias in meta-analysis detected by  
734 a simple, graphical test. *BMJ* **315**, 629–634.
- 735 EMBERTS, Z., HWANG, W.S. & WIENS, J.J. (2021) Weapon performance drives weapon evolution.  
736 *Proceedings of the Royal Society B: Biological Sciences* **288**, 20202898.
- 737 EMLEN, D.J. (2008) The Evolution of Animal Weapons. *Annual Review of Ecology, Evolution,*  
738 *and Systematics* **39**, 387–413.
- 739 FILICE, D.C.S. & DUKAS, R. (2019) Winners have higher pre-copulatory mating success but  
740 losers have better post-copulatory outcomes. *Proceedings of the Royal Society B: Biological*  
741 *Sciences* **286**, 20182838.
- 742 GOYENS, J., DIRCKX, J. & AERTS, P. (2015) Stag Beetle Battle Behavior and its Associated  
743 Anatomical Adaptations. *Journal of Insect Behavior* **28**, 227–244.
- 744 GRAFEN, A. (1987) The logic of divisively asymmetric contests: respect for ownership and the  
745 desperado effect. *Animal Behaviour* **35**, 462–467.
- 746 GRAHAM, Z.A., PADILLA-PEREZ, D.J. & ANGILLETTA, M.J. (2020) Virile crayfish escalate  
747 aggression according to body size instead of weapon size. *Animal Behaviour* **163**, 9–15.
- 748 GREEN, P.A. & PATEK, S.N. (2015) Contests with deadly weapons: telson sparring in mantis  
749 shrimp (Stomatopoda). *Biology Letters* **11**, 20150558.
- 750 HARDY, I.C.W. & BRIFFA, M. (2013) *Animal Contests*. Cambridge University Press.
- 751 HOEM, S.A., MELIS, C., LINNELL, J.D.C. & ANDERSEN, R. (2007) Fighting behaviour in territorial  
752 male roe deer *Capreolus capreolus*: the effects of antler size and residence. *European Journal*  
753 *of Wildlife Research* **53**, 1–8.
- 754 HOULE, D., PÉLABON, C., WAGNER, G.P. & HANSEN, T.F. (2011) Measurement and Meaning in  
755 Biology. *The Quarterly Review of Biology* **86**, 3–34.
- 756 HUNT, D., BARTON, N., CALDWELL, C., SANDER, C., BOISSEAU, R., ALLEN, C. & EMLEN, D. (2020)  
757 Singing Beetles? Figuring out how male rhinoceros beetles produce their courtship songs.  
758 [Undergraduate Thesis]. *University of Montana Conference on Undergraduate Research*  
759 *(UMCUR)*.
- 760 HUSAK, J.F., LAPPIN, A.K. & VAN DEN BUSSCHE, R.A. (2009) The fitness advantage of a high-  
761 performance weapon. *Biological Journal of the Linnean Society* **96**, 840–845.
- 762 JOHNS, A., GOTOH, H., MCCULLOUGH, E.L., EMLEN, D.J. & LAVINE, L.C. (2014) Heightened  
763 Condition-Dependent Growth of Sexually Selected Weapons in the Rhinoceros Beetle,  
764 *Trypoxylus dichotomus* (Coleoptera: Scarabaeidae). *Integrative and Comparative Biology* **54**,  
765 614–621.
- 766 KATSUKI, M., YOKOI, T., FUNAKOSHI, K. & OOTA, N. (2014) Enlarged Hind Legs and Sexual  
767 Behavior with Male-Male Interaction in *Sagra femorata* (Coleoptera: Chrysomelidae).  
768 *Entomological News* **124**, 211–220.



- 769 KIM, H., JANG, Y. & CHOE, J.C. (2011) Sexually dimorphic male horns and their use in agonistic  
770 behaviors in the horn-headed cricket *Loxoblemmus doenitzii* (Orthoptera: Gryllidae). *Journal of*  
771 *Ethology* **29**, 435–441.
- 772 KORICHEVA, J., GUREVITCH, J. & Mengersen, K. (2013) *Handbook of Meta-analysis in Ecology*  
773 *and Evolution*. Princeton University Press.
- 774 LAPPIN, A.K., BRANDT, Y., HUSAK, J.F., MACEDONIA, J.M. & KEMP, D.J. (2006) Gaping Displays  
775 Reveal and Amplify a Mechanically Based Index of Weapon Performance. *The American*  
776 *Naturalist* **168**, 100–113.
- 777 LAPPIN, A.K. & HUSAK, J.F. (2005) Weapon Performance, Not Size, Determines Mating Success  
778 and Potential Reproductive Output in the Collared Lizard (*Crotaphytus collaris*). *The American*  
779 *Naturalist* **166**, 426–436.
- 780 LIBERATI, A., ALTMAN, D.G., TETZLAFF, J., MULROW, C., GØTZSCHE, P.C., IOANNIDIS, J.P.A.,  
781 CLARKE, M., DEVEREAUX, P.J., KLEIJNEN, J. & MOHER, D. (2009) The PRISMA statement for  
782 reporting systematic reviews and meta-analyses of studies that evaluate health care  
783 interventions: explanation and elaboration. *Journal of Clinical Epidemiology* **62**, e1–e34.
- 784 LOBREGAT, G., GEHEL KLOSS, T., PEIXOTO, P.E.C. & SPERBER, C.F. (2019) Fighting in rounds:  
785 males of a neotropical cricket switch assessment strategies during contests. *Behavioral Ecology*  
786 **30**, 688–696.
- 787 MATHOT, K.J., DINGEMANSE, N.J. & NAKAGAWA, S. (2019) The covariance between metabolic  
788 rate and behaviour varies across behaviours and thermal types: meta-analytic insights.  
789 *Biological Reviews* **94**, 1056–1074.
- 790 MAYNARD SMITH, J. & PRICE, G.R. (1973) The Logic of Animal Conflict. *Nature* **246**, 15–18.
- 791 MCCULLOUGH, E.L. (2014) Mechanical limits to maximum weapon size in a giant rhinoceros  
792 beetle. *Proceedings of the Royal Society B: Biological Sciences* **281**, 20140696.
- 793 MCCULLOUGH, E.L., MILLER, C.W. & EMLÉN, D.J. (2016) Why Sexually Selected Weapons Are  
794 Not Ornaments. *Trends in Ecology & Evolution* **31**, 742–751.
- 795 MCCULLOUGH, E.L. & SIMMONS, L.W. (2016) Selection on male physical performance during  
796 male–male competition and female choice. *Behavioral Ecology* **27**, 1288–1295.
- 797 MCCULLOUGH, E.L., TOBALSKE, B.W. & EMLÉN, D.J. (2014) Structural adaptations to diverse  
798 fighting styles in sexually selected weapons. *Proceedings of the National Academy of Sciences*  
799 **111**, 14484–14488.
- 800 MICHONNEAU, F., BROWN, J.W. & WINTER, D.J. (2016) *rotl*: an R package to interact with the  
801 Open Tree of Life data. *Methods in Ecology and Evolution* **7**, 1476–1481.
- 802 NAKAGAWA, S. & CUTHILL, I.C. (2007) Effect size, confidence interval and statistical significance:  
803 a practical guide for biologists. *Biological Reviews* **82**, 591–605.
- 804 NAKAGAWA, S. & SANTOS, E.S.A. (2012) Methodological issues and advances in biological meta-  
805 analysis. *Evolutionary Ecology* **26**, 1253–1274.
- 806 O'BRIEN, D.M. & BOISSEAU, R.P. (2018) Overcoming mechanical adversity in extreme hindleg  
807 weapons. *PLoS ONE* **13**.
- 808 O'BRIEN, D.M., KATSUKI, M. & EMLÉN, D.J. (2017) Selection on an extreme weapon in the frog-  
809 legged leaf beetle (*Sagra femorata*). *Evolution* **71**, 2584–2598.
- 810 OLSSON, M. & SHINE, R. (2000) Ownership influences the outcome of male-male contests in the  
811 scincid lizard, *Niveoscincus microlepidotus*. *Behavioral Ecology* **11**, 587–590.

- 812 PALAORO, A.V. & BRIFFA, M. (2017) Weaponry and defenses in fighting animals: how allometry  
813 can alter predictions from contest theory. *Behavioral Ecology* **28**, 328–336.
- 814 PALAORO, A.V., PEIXOTO, P.E.C., BENSO-LOPES, F., BOLIGON, D.S. & SANTOS, S. (2020) Fight  
815 intensity correlates with stronger and more mechanically efficient weapons in three species of  
816 *Aegla* crabs. *Behavioral Ecology and Sociobiology* **74**.
- 817 PALAORO, A.V., VELASQUE, M., SANTOS, S. & BRIFFA, M. (2017) How does environment influence  
818 fighting? The effects of tidal flow on resource value and fighting costs in sea anemones. *Biology*  
819 *Letters* **13**, 20170011.
- 820 PARADIS, E., CLAUDE, J. & STRIMMER, K. (2004) *APE: Analyses of Phylogenetics and Evolution*  
821 in R language. *Bioinformatics* **20**, 289–290.
- 822 PEIXOTO, P.E.C. & BENSON, W.W. (2008) Body Mass and not Wing Length Predicts Territorial  
823 Success in a Tropical Satyrine Butterfly. *Ethology* **114**, 1069–1077.
- 824 PÉLABON, C., FIRMAT, C., BOLSTAD, G.H., VOJE, K.L., HOULE, D., CASSARA, J., ROUZIC, A.L. &  
825 HANSEN, T.F. (2014) Evolution of morphological allometry. *Annals of the New York Academy of*  
826 *Sciences* **1320**, 58–75.
- 827 PINTO, N.S., PALAORO, A.V. & PEIXOTO, P.E.C. (2019) All by myself? Meta-analysis of animal  
828 contests shows stronger support for self than for mutual assessment models. *Biological*  
829 *Reviews* **94**, 1430–1442.
- 830 POLLY, P.D. (2020) Functional Tradeoffs Carry Phenotypes Across the Valley of the Shadow of  
831 Death. *Integrative and Comparative Biology* **60**, 1268–1282.
- 832 POTTER, D.A., WRENSCH, D.L. & JOHNSTON, D.E. (1976) Aggression and Mating Success in  
833 Male Spider Mites. *Science* **193**, 160–161.
- 834 RICO-GUEVARA, A. & ARAYA-SALAS, M. (2015) Bills as daggers? A test for sexually dimorphic  
835 weapons in a lekking hummingbird. *Behavioral Ecology* **26**, 21–29.
- 836 RICO-GUEVARA, A. & HURME, K.J. (2019) Introsexually selected weapons. *Biological Reviews*  
837 **94**, 60–101.
- 838 ROBINSON, C.D. & GIFFORD, M.E. (2019) Sexual dimorphism in performance and muscle  
839 allocation in the western painted crayfish *Faxonius palmeri longimanus* (Faxon, 1898)  
840 (Decapoda: Astacidea: Cambaridae). *Journal of Crustacean Biology* **39**, 267–273.
- 841 ROHATGI, A. (2019) *WebPlotDigitizer 4.2*: HTML5 based online tool to extract numerical data  
842 from plot images. <https://Automeris.io/WebPlotDigitizer>.
- 843 SZÁMADÓ, S. (2008) How threat displays work: species-specific fighting techniques, weaponry  
844 and proximity risk. *Animal Behaviour* **76**, 1455–1463.
- 845 TAYLOR, J.R.A. & PATEK, S.N. (2010) Ritualized fighting and biological armor: the impact  
846 mechanics of the mantis shrimp's telson. *Journal of Experimental Biology* **213**, 3496–3504.
- 847 UMBERS, K.D., TATARNIC, N.J., HOLWELL, G.I. & HERBERSTEIN, M.E. (2012) Ferocious fighting  
848 between male grasshoppers. *PLoS One*.
- 849 VIEIRA, M.C. & PEIXOTO, P.E.C. (2013) Winners and losers: a meta-analysis of functional  
850 determinants of fighting ability in arthropod contests. *Functional Ecology* **27**, 305–313.
- 851 WAINWRIGHT, P.C., ALFARO, M.E., BOLNICK, D.I. & HULSEY, C.D. (2005) Many-to-One Mapping  
852 of Form to Function: A General Principle in Organismal Design? *Integrative and Comparative*  
853 *Biology* **45**, 256–262.

- 854 WEAVER, R.J., SANTOS, E.S.A., TUCKER, A.M., WILSON, A.E. & HILL, G.E. (2018) Carotenoid  
855 metabolism strengthens the link between feather coloration and individual quality. *Nature*  
856 *Communications* **9**, 1–9.
- 857 WILSON, R.S., ANGILLETTA JR., M.J., JAMES, R.S., NAVAS, C. & SEEBACHER, F. (2007) Dishonest  
858 Signals of Strength in Male Slender Crayfish (*Cherax dispar*) during Agonistic Encounters. *The*  
859 *American Naturalist* **170**, 284–291.
- 860 YOSHINO, K., KOGA, T. & OKI, S. (2011) Chelipeds are the real weapon: cheliped size is a more  
861 effective determinant than body size in male–male competition for mates in a hermit crab.  
862 *Behavioral Ecology and Sociobiology* **65**, 1825.

863

864 **Table 1.** Definitions used throughout this paper.

865

| <b>Term</b>     | <b>Definition</b>                                                                                                                                                                                                                                                                                                                  |
|-----------------|------------------------------------------------------------------------------------------------------------------------------------------------------------------------------------------------------------------------------------------------------------------------------------------------------------------------------------|
| Weapon          | Specialized morphology used to gain mechanical advantage on rivals during physical contact.                                                                                                                                                                                                                                        |
| Display         | Any behaviour or movement that can be used as a cue of fighting ability, or as a threat behaviour. In most species, it is the part of the contest that does not involve physical contact. In the species where rivals are in physical contact, it is associated with physical contact of low intensity, such as antennae touching. |
| Fight           | Part of the contest where the individuals are within reach of one another and are in physical contact. Can be seen as a physical struggle between two rivals.                                                                                                                                                                      |
| Contest         | Aggressive competition between two rivals of the same species for an indivisible resource. Can be composed of two phases: a display phase and a physical contact phase.                                                                                                                                                            |
| Fighting style  | Behaviours performed during physical contact that aim to gain mechanical advantage over the rival. Can be composed of either a single or multiple behaviour used simultaneously. Frequently associated with movements of the weapon itself (e.g., squeezing).                                                                      |
| Weapon function | The combination of display and fighting style an individual uses during a contest. See Table 3 and Table S1 for a detailed list of weapon function.                                                                                                                                                                                |

866

867

868 **Table 2.** Heterogeneity of the multilevel meta-analytical model of differences in how weapons  
869 are measured.

| <b>Random effect</b>  | <b>I<sup>2</sup> (95% CI)</b> |
|-----------------------|-------------------------------|
| Study ID              | 10.93 (9.009, 12.85)          |
| Pairing method        | 17.37 (15.44, 19.29)          |
| Phylogeny             | 0.012 (0.00, 1.92)            |
| Genus                 | 0.0001 (0.00, 1.92)           |
| Total                 | 23.71 (21.79, 25.63)          |
| <i>H</i> <sup>2</sup> | <0.001 (0.00, 1.92)           |

870

871 **Table 3.** Functions (lines) and displays (columns) of fighting styles found across the 52 species  
 872 of animals used in our study. All possible combinations of the five functions were considered,  
 873 even though some of them were absent for our sample. To see how each species was  
 874 categorized, please see Fig. 1 and Supplementary File S2 for the descriptions.

| FUNCTION                     | WEAPON DISPLAY | BODY SIZE ESTIMATION | NO DISPLAY | TOTAL     |
|------------------------------|----------------|----------------------|------------|-----------|
| Squeezing                    | 12             | 1                    | -          | 13        |
| Impact                       | 1              | 1                    | -          | 2         |
| Pushing                      | 1              | -                    | -          | 1         |
| Lift + Squeezing             | 1              | 1                    | 1          | 3         |
| Lift + Impact                | 3              | -                    | 1          | 4         |
| Lift + Pushing               | 2              | 1                    | 1          | 4         |
| Squeezing + Impact           | 3              | -                    | -          | 3         |
| Squeezing + Piercing         | -              | 1                    | -          | 1         |
| Squeezing + Pushing          | 1              | 5                    | 1          | 7         |
| Squeeze + Pull               | 1              | 2                    | -          | 3         |
| Impact + Pushing             | -              | 3                    | -          | 3         |
| Piercing + Pushing           | 1              | -                    | -          | 1         |
| Push + Impact + Lift         | 2              | -                    | -          | 2         |
| Push + Impact + Squeeze      | 1              | 1                    | -          | 2         |
| Push + Lift + Squeeze        | 1              | 1                    | -          | 2         |
| Push + Squeeze + Pull + Lift | 1              | -                    | -          | 1         |
| <b>TOTAL</b>                 | <b>31</b>      | <b>18</b>            | <b>3</b>   | <b>52</b> |

875

876

877 **Table 4.** Heterogeneity of the meta-analytical model of differences in how contests begin (i.e., if  
878 displays are used, and which type of displays).

| <b>Random effect</b>  | <b>I<sup>2</sup> (95% CI)</b> |
|-----------------------|-------------------------------|
| Study ID              | 9.75 (7.83, 11.67)            |
| Pairing method        | 17.93 (16.01, 19.85)          |
| Phylogeny             | 5.84 (3.92, 7.76)             |
| Genus                 | < 0.0001 (0.00, 1.92)         |
| Total                 | 33.54 (31.62, 35.46)          |
| <i>H</i> <sup>2</sup> | 0.17 (0.00, 2.09)             |

879

880 **Table 5.** Heterogeneity and variance of the meta-analytical model of differences in how  
881 weapons are used during contests.

| <b>Random effect</b>  | <b>I<sup>2</sup> (95% CI)</b> |
|-----------------------|-------------------------------|
| Study ID              | 6.91 (4.99, 8.83)             |
| Pairing method        | 18.46 (16.54, 20.38)          |
| Phylogeny             | < 0.0001 (0.00, 1.92)         |
| Genus                 | < 0.0001 (0.00, 1.92)         |
| Total                 | 25.38 (23.46, 27.30)          |
| <i>H</i> <sup>2</sup> | < 0.0001 (0.00, 1.92)         |

882

883

884 FIGURE LEGENDS

885 **Fig. 1.** Hedges'  $g$  value (circle) and corresponding confidence intervals (lines) for species,  
886 pairing method (whether contests were paired for body size or not), component measured (e.g.,  
887 length, width, mass), type of display (i.e., displaying weapon, body size, or not displaying) and  
888 function of the weapon during the contests (see topic 3). Study demonstrates which samples  
889 were taken from the same study (references in Supplementary File S1). Larger grey circles  
890 denote studies with larger sample sizes. Silhouettes were taken from phylopic. Grey rows were  
891 selected randomly to facilitate visual separation of groups. For more information regarding the  
892 studies and pairing methods, see Fig. S3.

893

894

895 **Fig 2.** Weapons had an overall positive effect on contest success with winners having greater  
896 trait values than losers. Linear measures had a higher difference between winners and losers  
897 than performance measures demonstrating that winners tend to have much larger, rather than  
898 stronger weapons, than losers ( $QM_1 = 23.29$ ,  $p < 0.001$ ). The effect size, Hedges'  $g$ , represents the  
899 mean standardized difference between winners and losers. Positive values denote that winners  
900 were larger than losers, while negative values represent the opposite. Dots represent the  
901 estimated values from a multilevel meta-analytic model considering Hedges'  $g$  as the response  
902 variable, weapon component as a moderator variable, and study ID, species ID, phylogeny,  
903 environment and pairing method as random variables. The error bars represent the 95%  
904 confidence interval of the estimate. The numbers above the error bars represent the number of  
905 effect sizes in each component.

906

907



908 **Fig. 3.** Winners had larger weapons than losers regardless of the type of display, but these  
909 differences were similar among the types of display. The effect size, Hedges'  $g$ , represents the  
910 mean standardized difference in linear measures between winners and losers. Positive values  
911 denote that winners had larger weapons than losers, while negative values represent the  
912 opposite. Dots represent the estimated values from a multilevel meta-analytic model  
913 considering Hedges'  $g$  as the response variable and the type of display as a moderator variable.  
914 The error bars represent the 95% confidence interval of the estimate. The numbers above the  
915 error bars represent the number of effect size in each component.

916

917

918 **Fig. 4.** Winners had weapons that were, on average, larger than losers; and asymmetries  
919 between winners and losers in performance-emphasis were lower than the other two fighting  
920 styles. The effect size, Hedges'  $g$ , represents the mean standardized difference in the linear  
921 measures of weapons between winners and losers. Positive values denote that winners had  
922 larger weapons than losers, while negative values represent the opposite. Dots represent the  
923 estimated values from a multilevel meta-analytic model considering Hedges'  $g$  as the response  
924 variable and the fighting style as a moderator variable. The error bars represent the 95%  
925 confidence interval of the estimate. The numbers above the error bars represent the number of  
926 effect size in each component.

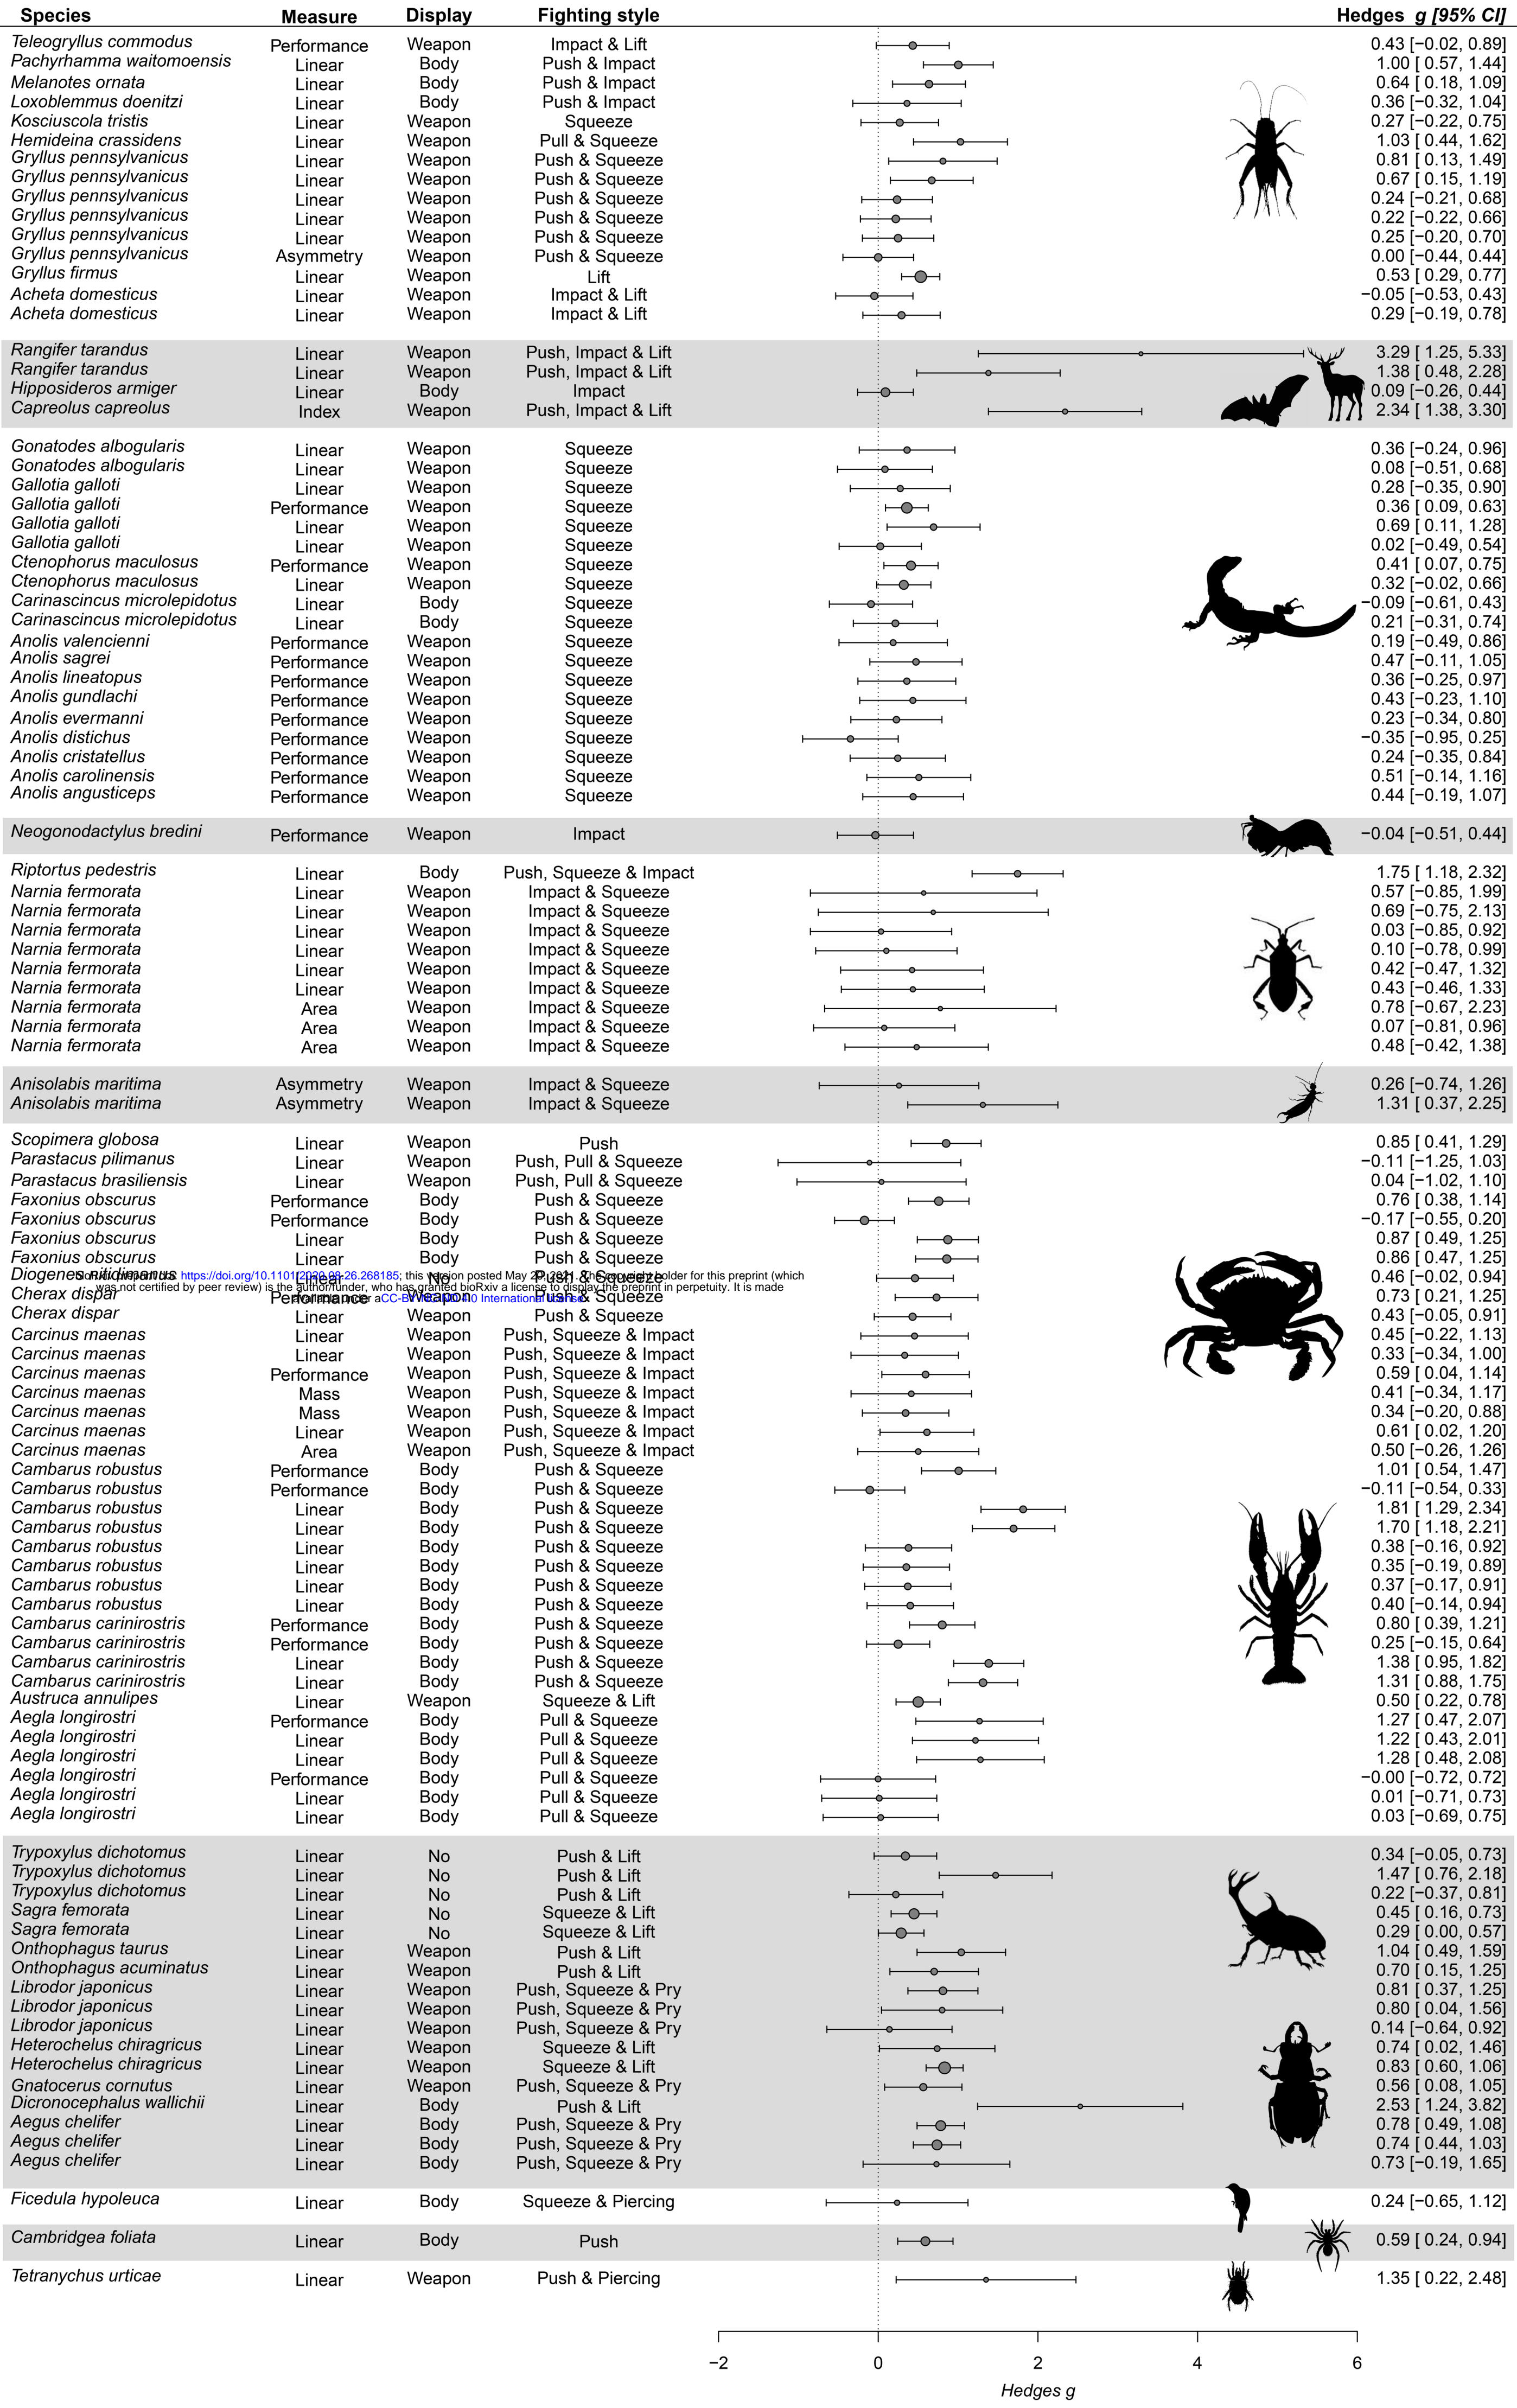

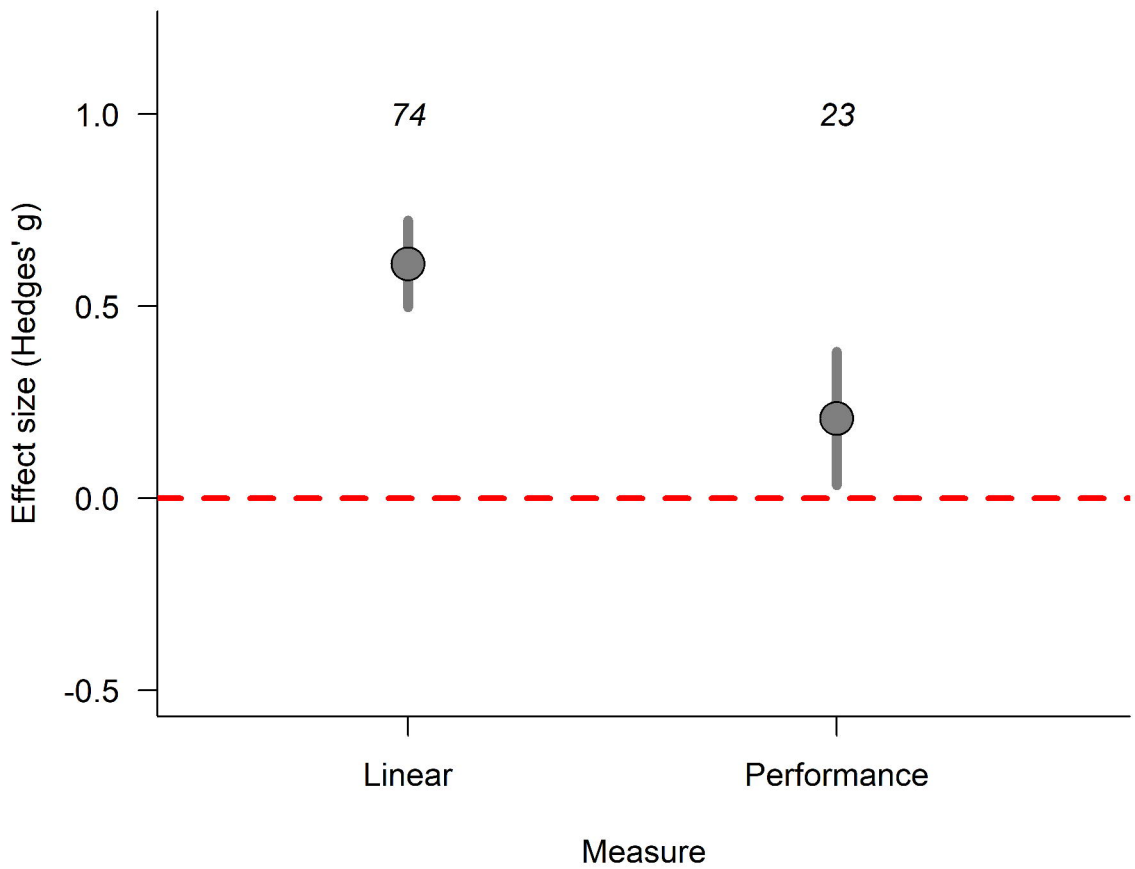

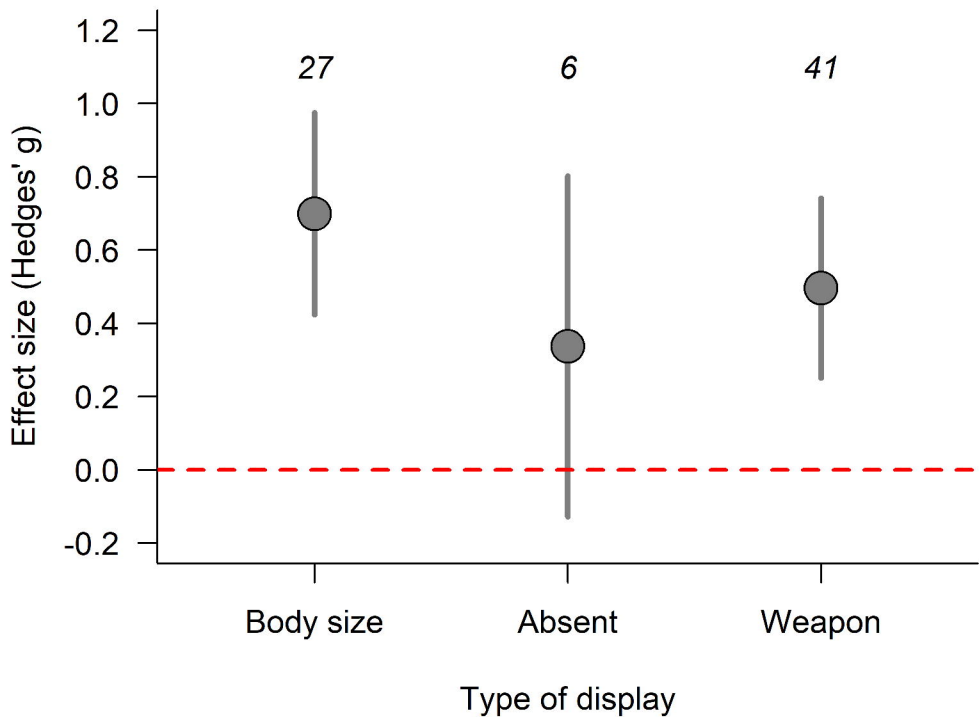

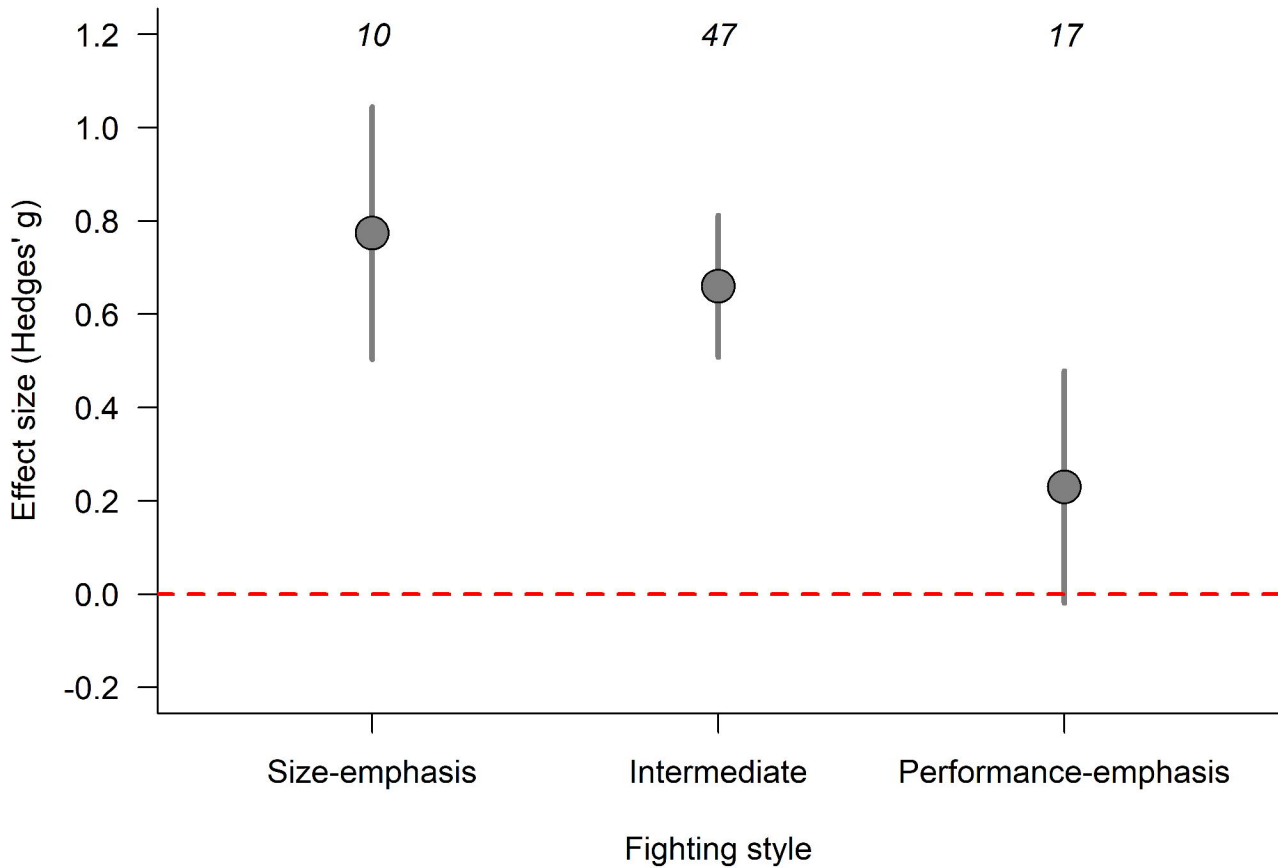

Source: http://biorxiv.org/content/10.1101/2020.08.26.268185v4.full.pdf
